# Supplementary material for: Plasma Cell-Free DNA as a Novel Biomarker for the Diagnosis and Monitoring of Atherosclerosis
Source: MDPI journal article supplement (doi:10.3390/cells11203248), 2022-10-16
Supplement: s1 [file s1]

Supplemental Figure

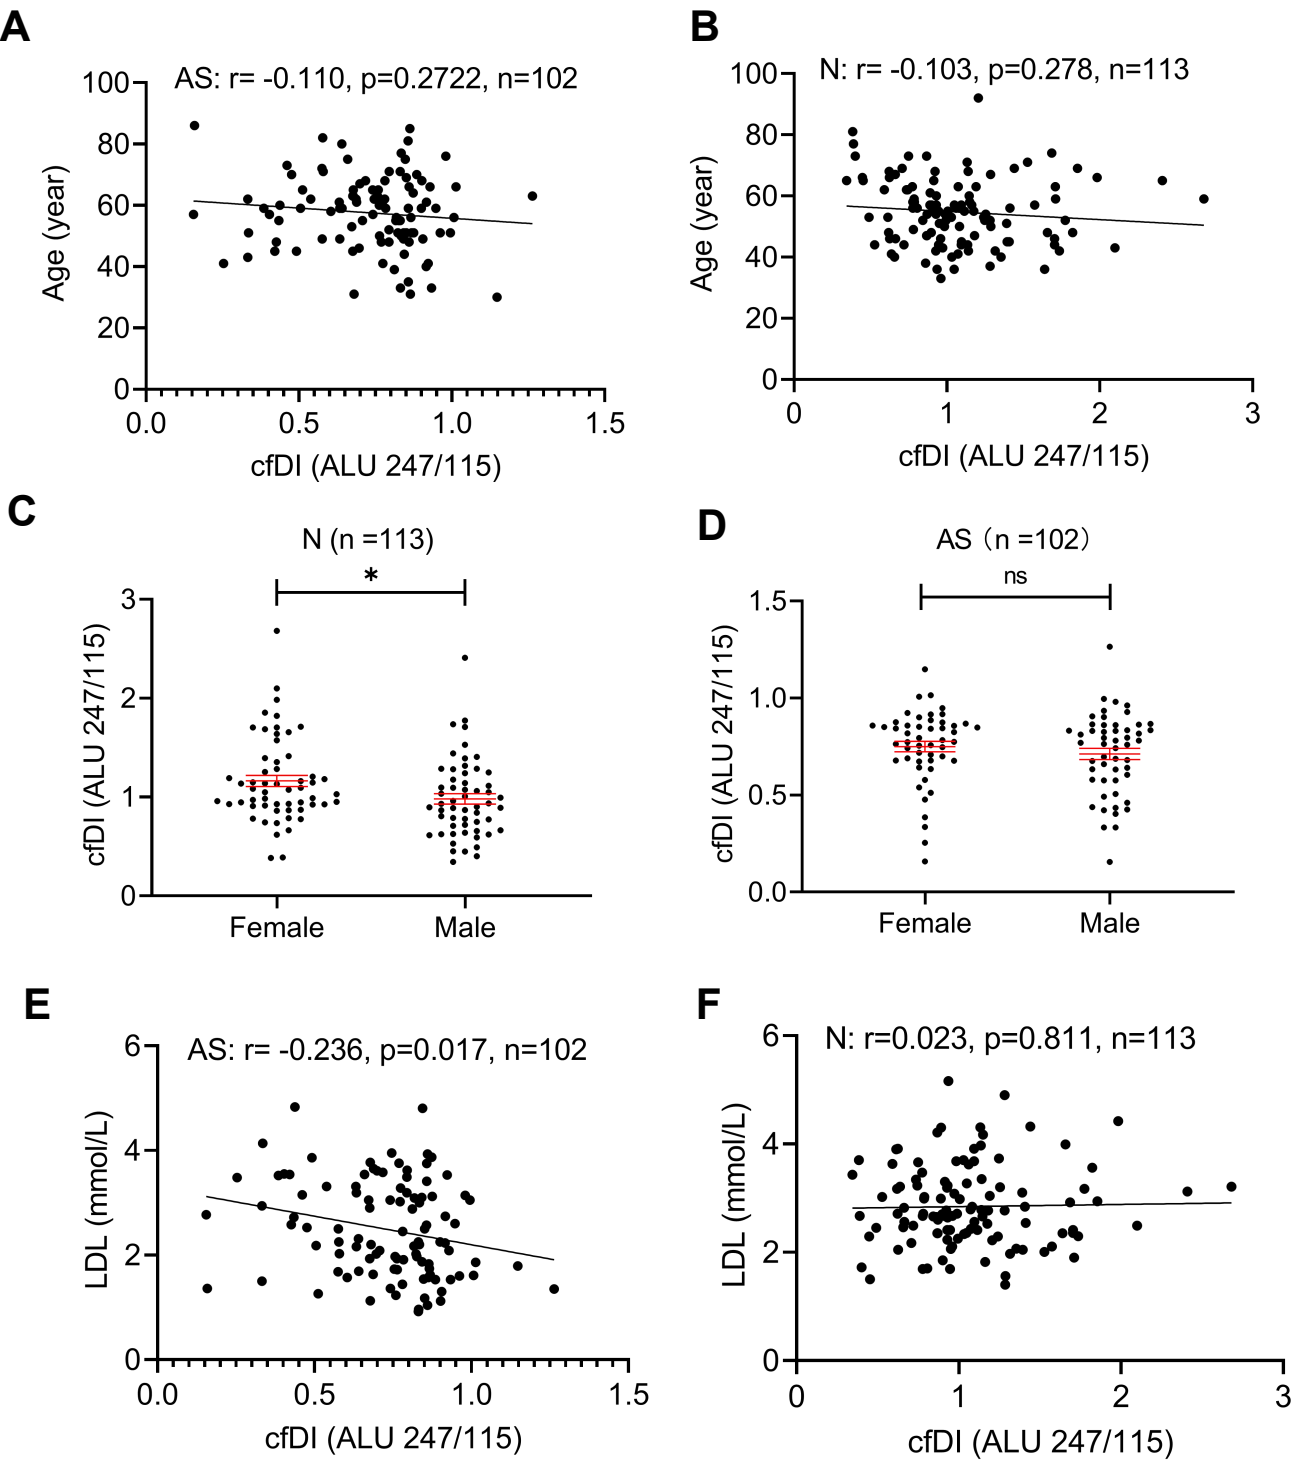

**Figure S1. Analysis of association between clinical factors and cfDI.** (A-B), correlations of age and cfDI in AS patients (A) and normal controls (B). (C-D), The level of cfDI between different genders in normal group (C) and patient group (D). (E-F), correlations of LDL and cfDI in AS patients (E) and normal controls (F).

Table S1 The basic characteristics of AS patients and normal controls in this study

|                             | N (n=113)     | AS (n=102)    | P value |
|-----------------------------|---------------|---------------|---------|
| Female (%)                  | 56 (49.6%)    | 50 (49.0%)    |         |
| Age (year)                  | 54.8 ± 1.02   | 57.58 ± 1.20  | 0.1698  |
| CRP (mg/dl)                 | 1.57 ± 0.37   | 6.38 ± 1.80   | 0.02    |
| WBC (*10 <sup>9</sup> /L)   | 5.88 ± 0.13   | 6.55 ± 0.18   | 0.0029  |
| MONO (*10 <sup>9</sup> /L)  | 0.29 ± 0.01   | 0.45 ± 0.01   | <0.0001 |
| NEUT (*10 <sup>9</sup> /L)  | 3.5 ± 0.09    | 3.97 ± 0.16   | 0.0109  |
| LYMPH (*10 <sup>9</sup> /L) | 1.82 ± 0.05   | 1.98 ± 0.08   | 0.0699  |
| TG (mmol/L)                 | 1.57 ± 0.11   | 2.08 ± 0.17   | 0.0147  |
| TC (mmol/L)                 | 4.89 ± 0.08   | 4.34 ± 0.13   | 0.0002  |
| HDL (mmol/L)                | 1.26 ± 0.03   | 1.42 ± 0.10   | 0.1594  |
| LDL (mmol/L)                | 2.85 ± 0.07   | 2.71 ± 0.10   | 0.2643  |
| Apo A1 (g/L)                | 1.53 ± 0.04   | 1.69 ± 0.10   | 0.3138  |
| Apo B (g/L)                 | 0.91 ± 0.03   | 1.20 ± 0.12   | 0.1231  |
| Lpα (ng/L)                  | 137.9 ± 25.45 | 246.4 ± 22.6  | 0.0075  |
| HCY(μmol/L)                 | 13.55 ± 0.64  | 12.67 ± 1.99  | 0.6022  |
| VB12(pg/mL)                 | 322.6 ± 21.32 | 501.5 ± 88.39 | 0.1005  |
| Folate(nmol/L)              | 11.2 ± 0.91   | 8.67 ± 0.89   | 0.0598  |

CRP, C reactive protein; WBC, white blood cell; MONO, monocyte; NEUT, neutrophil; LYMPH, lymphocyte; TG, triglycerides; TC, total cholesterol; HDL, high-density lipoprotein; LDL, low-density lipoprotein; Apo A1, apolipoprotein A; Apo B, apolipoprotein B; Lpα, Lipoprotein a; Hcy, homocysteine; VB12, vitamin B12.
